# Supplementary material for: Computational promoter analysis of mouse, rat and human antimicrobial peptide-coding genes
Source: Springer Nature journal article supplement (doi:10.1186/1471-2105-7-s5-s8), 2006-12-01
Supplement: Additional file 1 [file 1471-2105-7-s5-s8-s1.pdf]

**Supplementary Table 1. FANTOM3 dataset-derived AMP transcripts which were new to mouse and absent in human.**

| <b>Riken clone ID/<br/>GenBank accession</b> | <b>Gene Symbol</b> |
|----------------------------------------------|--------------------|
| D730003B11                                   | <i>Csnd</i>        |
| D730017I01                                   | <i>Csnd</i>        |
| D730018F19                                   | <i>Csnd</i>        |
| D730018I02                                   | <i>Csnd</i>        |
| D730032K03                                   | <i>Csnd</i>        |
| D730045O16                                   | <i>Csnd</i>        |
| D730048M03                                   | <i>Csnd</i>        |
| 2010300L12                                   | <i>Defcr-rs1</i>   |
| 2010319H24                                   | <i>Defcr-rs1</i>   |
| 5033416M10                                   | <i>Mcpt2</i>       |
| G630050E22                                   | <i>Mcpt4</i>       |
| 9030622B11                                   | <i>Mcpt8</i>       |
| 0610031H01                                   | <i>Hist2h2aa2</i>  |
| 1700048I17                                   | <i>Hist2h2aa2</i>  |
