# Supplementary material for: Computational promoter analysis of mouse, rat and human antimicrobial peptide-coding genes
Source: Springer Nature journal article supplement (doi:10.1186/1471-2105-7-s5-s8), 2006-12-01
Supplement: Additional file 9 [file 1471-2105-7-s5-s8-s9.pdf]

**Supplementary Table 9A. TF binding sites that correspond to *ab initio*-predicted motifs derived from the Penk family promoter regions.**

| Motif no. | Motif Occurrence | Motif           | TF binding sites                                                                                                                                                             |
|-----------|------------------|-----------------|------------------------------------------------------------------------------------------------------------------------------------------------------------------------------|
| 1         | 3                | CCAGTAACCTGCG   | FXR:RXR-alpha, LXR-alpha:RXR-alpha, LXR-beta:RXR-alpha, ERRalpha1                                                                                                            |
| 2         | 3                | TATAAAGTGGCTGT  | <u>TFIID</u> , <u>TBP</u>                                                                                                                                                    |
| 3         | 3                | GATCTAAAGAAGAAA | AR, GR                                                                                                                                                                       |
| 4         | 3                | CCAAGTCCGTC     | SF-1, GR                                                                                                                                                                     |
| 5         | 3                | TTAAGATCCCCA    | <u>NF-kappaB1</u> , <u>NF-kappaB2</u> , <u>NF-kappaB2 precursor</u> , <u>AP-2alpha</u> , <u>AP-2alphaA</u>                                                                   |
| 6         | 3                | GTGATDCAGGA     | <u>AP-1</u> , c-Fos, c-Jun, JunD                                                                                                                                             |
| 7         | 3                | TCCAGVAAGDH     | c-Ets-1, Elk-1, SAP-1a, SAP-1b, SRF, PEA3, ELF-1                                                                                                                             |
| 8         | 3                | CAGGCGTCGGCGCG  | DREB1A, ZF5, E2F                                                                                                                                                             |
| 9         | 3                | CGATTGGGGCGCGC  | <u>NFI/CTF</u> , <u>CTF</u> , <u>NF-Y</u>                                                                                                                                    |
| 10        | 3                | CCAGAVAGGCAG    | UBP-1, GATA-1, GATA-3, Meis-1a, Meis-1b, GATA-4, RXR-beta, VDR, MOT3                                                                                                         |
| 11        | 3                | CCGGTCTCTA      | Unknown                                                                                                                                                                      |
| 12        | 3                | AGCCCGTGBC      | USF-1, USF1, USF2, USF2b, USF, HMBP, EmBP-1a                                                                                                                                 |
| 13        | 3                | GTGACTTTGCCCA   | DSF, GCN4, COUP-TF1, RAR-beta, RXR-alpha, RAR-alpha1, TLX, Pax-2.1, Pax-2.2, IRF-4, IRF-8, AP-2alpha, AP-2alphaA, C/EBPgamma, PPAR-gamma:RXR-alpha, VDR, LXR-alpha:RXR-alpha |
| 14        | 3                | GATCTGTBTT      | Sox2, Meis-1a, Meis-1b, GR                                                                                                                                                   |
| 15        | 3                | TGAAATTTGG      | Unknown                                                                                                                                                                      |
| 16        | 3                | GCTGTGGGGACGTCC | AML1, AML1a, AML1c, <u>MZF1</u> , MIG1, <u>MZF-1</u> , <u>AP-2alpha</u> , <u>AP-2alphaA</u> , MBP-1, <u>NF-kappaB1</u> , <u>NF-kappaB2</u> , <u>NF-kappaB2 precursor</u>     |
| 17        | 3                | BHHCAAGAGGA     | Unknown                                                                                                                                                                      |
| 18        | 3                | GGAAGGGGCAG     | VDR, LXR-alpha:RXR-alpha, CAC-binding protein, NF-E2, PPAR-gamma:RXR-alpha, Sp1                                                                                              |
| 19        | 3                | AHGCCCCAACC     | Sp1, PPAR-gamma:RXR-alpha, VDR, LXR-alpha:RXR-alpha, AP-2alphaA, ADR1 C/EBPalpha, C/EBPbeta                                                                                  |
| 20        | 3                | GGACAGGATG      | Meis-1a, Meis-1b, Elk-1, SAP-1a, SAP-1b, SRF, E47, Fli-1, Net, TCF                                                                                                           |

All motifs were detected in mouse, rat and human sequences. The underlined TF binding sites are known to bind TFs in the proenkephalin promoter region [24][25][26][27]. The species abbreviations are Hs: *Homo sapiens*; Mm: *Mus musculus*; Rn: *Rattus norvegicus*. Unknown: motif does not match any of the TRANSFAC-listed TF binding sites.

24. Liu F, Kondova I, Kilpatrick DL. **Detection of PACH1, a nuclear factor implicated in the transcriptional regulation of meiotic and early haploid stages of spermatogenesis.** *Mol Reprod Dev* 2000, **57**: 224-231.
25. Kobierski LA, Wong AE, Srivastava S, Borsook D, Hyman SE. **Cyclic AMP-dependent activation of the proenkephalin gene requires phosphorylation of CREB at serine-133 and a Src-related kinase.** *J Neurochem* 1999, **73**: 129-138.
26. Fu W, Shah SR, Jiang H, Hilt DC, Dave HP, et al. **Transactivation of proenkephalin gene by HTLV-1 tax1 protein in glial cells: involvement of Fos/Jun complex at an AP-1 element in the proenkephalin gene promoter.** *J Neurovirol* 1997, **3**: 16-27.
27. Le Y, Gagneten S, Larson T, Santha E, Dobi A, et al. **Far-upstream elements are dispensable for tissue-specific proenkephalin expression using a Cre-mediated knock-in strategy.** *J Neurochem* 2003, **84**: 689-697.

**Supplementary Table 9B. Motif arrangements in promoter region in mouse (4922504O09), human (HIX0007519.2) and rat (NM\_017139) of Penk family members.** The species abbreviations are Hs: *Homo sapiens*; Mm: *Mus musculus*; Rn: *Rattus norvegicus*.

| Species    | Motif arrangement            |
|------------|------------------------------|
| Hs,Rn      | 3-5-15-18-4-16-8-9-2-10-1-13 |
| Mm, Hs     | 7-12-3-5-1-13                |
| Hs, Rn     | 3-5-1-13-20                  |
| Mm, Hs, Rn | 3-5-1-13                     |
