# Supplementary material for: Computational promoter analysis of mouse, rat and human antimicrobial peptide-coding genes
Source: Springer Nature journal article supplement (doi:10.1186/1471-2105-7-s5-s8), 2006-12-01
Supplement: Additional file 11 [file 1471-2105-7-s5-s8-s11.pdf]

**Supplementary Table 11. P-value table of motif groups.** The row with bold-face values indicates the boundary of eleven AMP families that were significantly enriched in predicted NHR-binding motifs relative to the whole AMP family set.

| No. of NHR-binding motif candidates in subpopulation | No. of motifs from all families included in subpopulations | No. of NHR-binding motif candidates | Total population (motifs from all families) | Bonferroni correction factor | p-value            | Bonferroni corrected p-value | No. of groups included in statistically significant set |
|------------------------------------------------------|------------------------------------------------------------|-------------------------------------|---------------------------------------------|------------------------------|--------------------|------------------------------|---------------------------------------------------------|
| 137                                                  | 420                                                        | 139                                 | 440                                         | 440                          | 0.023154572        | 1                            | 21                                                      |
| 135                                                  | 400                                                        | 139                                 | 440                                         | 440                          | 0.000884858        | 0.389337708                  | 20                                                      |
| 132                                                  | 380                                                        | 139                                 | 440                                         | 440                          | 0.000128334        | 0.056466838                  | 19                                                      |
| 128                                                  | 360                                                        | 139                                 | 440                                         | 440                          | 5.62042E-05        | 0.024729858                  | 18                                                      |
| 123                                                  | 340                                                        | 139                                 | 440                                         | 440                          | 5.99005E-05        | 0.026356217                  | 17                                                      |
| 118                                                  | 320                                                        | 139                                 | 440                                         | 440                          | 4.74915E-05        | 0.020896267                  | 16                                                      |
| 113                                                  | 300                                                        | 139                                 | 440                                         | 440                          | 3.08239E-05        | 0.013562527                  | 15                                                      |
| 108                                                  | 280                                                        | 139                                 | 440                                         | 440                          | 1.69494E-05        | 0.00745775                   | 14                                                      |
| 103                                                  | 260                                                        | 139                                 | 440                                         | 440                          | 7.94636E-06        | 0.0034964                    | 13                                                      |
| 98                                                   | 240                                                        | 139                                 | 440                                         | 440                          | 3.14129E-06        | 0.001382167                  | 12                                                      |
| <b>92</b>                                            | <b>220</b>                                                 | <b>139</b>                          | <b>440</b>                                  | <b>440</b>                   | <b>2.81167E-06</b> | <b>0.001237134</b>           | <b>11</b>                                               |
| 85                                                   | 200                                                        | 139                                 | 440                                         | 440                          | 5.55134E-06        | 0.002442591                  | 10                                                      |
| 78                                                   | 180                                                        | 139                                 | 440                                         | 440                          | 9.01694E-06        | 0.003967454                  | 9                                                       |
| 71                                                   | 160                                                        | 139                                 | 440                                         | 440                          | 1.22648E-05        | 0.005396502                  | 8                                                       |
| 64                                                   | 140                                                        | 139                                 | 440                                         | 440                          | 1.39428E-05        | 0.006134828                  | 7                                                       |
| 56                                                   | 120                                                        | 139                                 | 440                                         | 440                          | 3.3908E-05         | 0.014919519                  | 6                                                       |
| 48                                                   | 100                                                        | 139                                 | 440                                         | 440                          | 6.8438E-05         | 0.030112705                  | 5                                                       |
| 40                                                   | 80                                                         | 139                                 | 440                                         | 440                          | 0.000112308        | 0.049415705                  | 4                                                       |
| 31                                                   | 60                                                         | 139                                 | 440                                         | 440                          | 0.000399135        | 0.175619353                  | 3                                                       |

Brahmachary *et al.* Computational Promoter Analysis of Mouse, Rat and Human Antimicrobial Peptide-coding Genes

|    |    |     |     |     |             |             |   |
|----|----|-----|-----|-----|-------------|-------------|---|
| 22 | 40 | 139 | 440 | 440 | 0.001106333 | 0.486786677 | 2 |
| 12 | 20 | 139 | 440 | 440 | 0.006893247 | 1           | 1 |
